# Supplementary material
Source: Royal Society of Chemistry journal article supplement (doi:10.1039/d6ta01450j)
Supplement: d6ta01450j1.pdf [file d6ta01450j1.pdf]

## Impact of Area Scaling on the Performance and Stability of Spin-Coated Organic Solar Cells: From 0.09 to 4 cm<sup>2</sup>

Angel Sacramento, <sup>\*a</sup> Mohamed Samir, <sup>a</sup> Osbel Almora, <sup>a</sup> Amina Shehbaz, <sup>a</sup> and Lluís F. Marsal<sup>\*a</sup>

### Supporting information

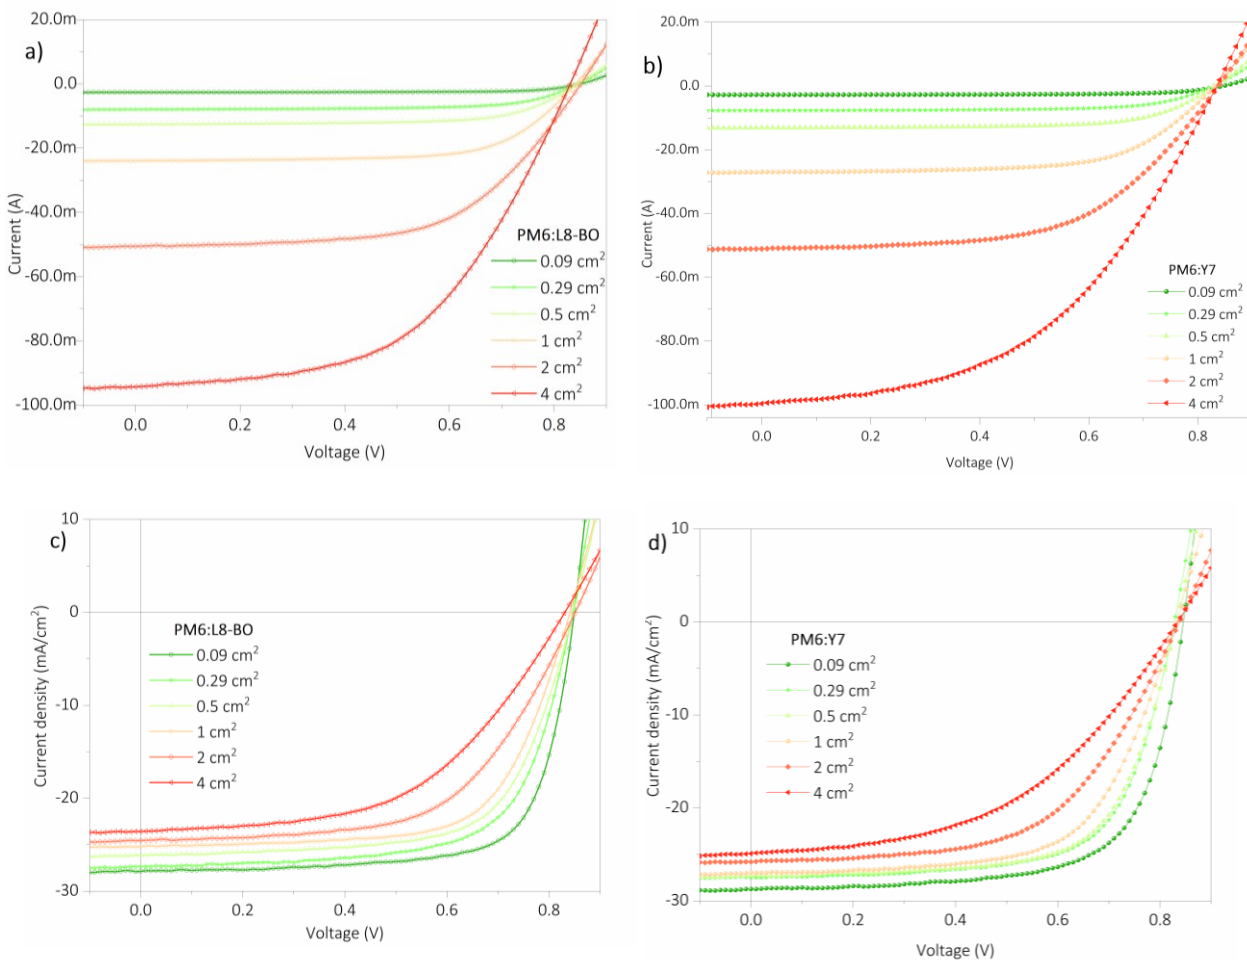

**S1.** Experimental *I-V* and *J-V* curves for devices with small and scaled active areas for PM6:L8-BO (a and c) and PM6:Y7 (b and d), respectively.

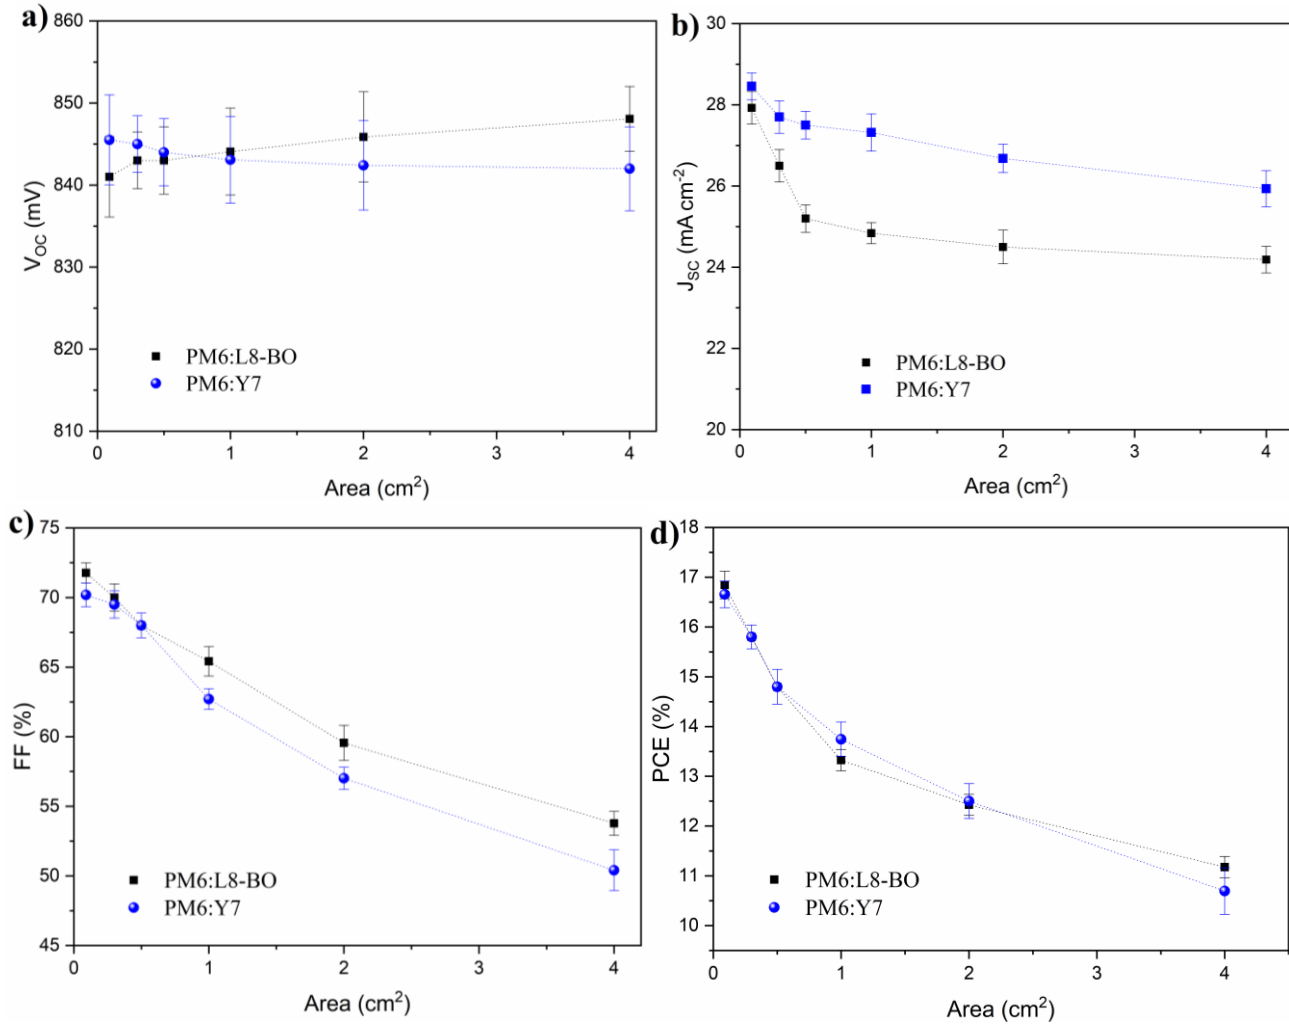

**S2.** Performance parameters of fabricated OSCs with different active areas and material layers (PM6:Y7 and PM6:L8-BO). (a) Open circuit voltage ( $V_{oc}$ ), (b) short circuit current density ( $J_{sc}$ ), (c) Fill factor ( $FF$ ), and (d) Power conversion efficiency ( $PCE$ ). All parameters were averaged over twenty devices.

### The characteristic photo-resistance:

$$R_{ph} = \frac{V_{oc}}{J_{sc}} \quad (1)$$

The parameter in Equation (1) not only informs on how much photovoltage is produced per unit photocurrent under a given illumination intensity but also introduces a practical indication on whether the parasitic resistances may affect the  $FF$ .

In the absence of ohmic losses (i.e.,  $R_s \rightarrow 0$ ,  $R_{sh} \rightarrow \infty$ ) the  $FF$  can be expressed as a function of the photovoltage. For normalized photovoltages  $v_{oc} = \frac{V_{oc}}{mV_{th}} > 10$ , being  $m$  the ideality factor and  $V_{th} = 26$  mV at room temperature, the  $FF$  can be accurately approximated to<sup>1</sup>

$$FF_0 = \frac{v_{oc} - \ln[v_{oc} + 0.72]}{v_{oc} + 1} \quad (2)$$

However, the closer the values of  $R_s$  or  $R_{sh}$  to  $R_{ph}$ , the higher the reduction of  $FF$  due to these parameters, which limits the validity of Equation (2). Therefore, new expressions are introduced

for isolating the parasitic ohmic effects. The  $FF$  as a function of sole series resistance effects can be calculated with the empirical equation:<sup>1</sup>

$$FF_s = FF_0 \left( 1 - \frac{R_s}{R_{ph}} \right) \quad (3)$$

Similarly, the  $FF$  as a function of sole shunt resistance effects can be calculated with the empirical equation:<sup>1</sup>

$$FF_{sh} = FF_0 \left( 1 - FF_0 \frac{(v_{oc} + 0.7) R_{ph}}{v_{oc} R_{sh}} \right) \quad (4)$$

For the studied samples,  $R_{ph}$  was reported in the range  $\sim 33 \Omega \text{ cm}^2$  which suggests that significant influence would be expected in the  $FF$  for  $R_s > 3 \Omega \text{ cm}^2$  and  $R_{sh} < 300 \Omega \text{ cm}^2$ . This is better illustrated in Fig. 2 (main paper), where the experimental  $FF$  is much closely resembled by the theoretical prediction of Equation (3) than Equation (4), confirming the main contribution of series resistance to the  $FF$  reduction upon upscaling.

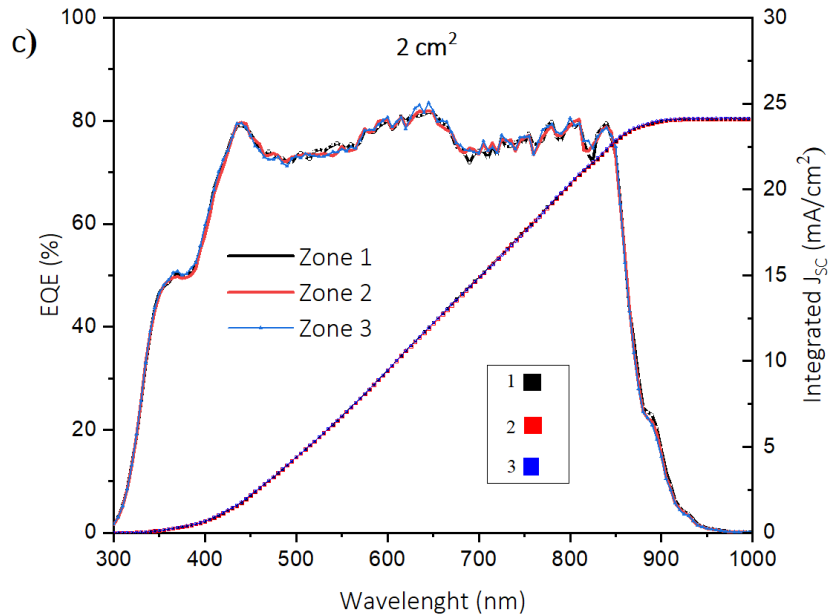

**S3.** EQE and calculated  $J_{sc}$  obtained from three different locations of a single  $2 \text{ cm}^2$  PM6:Y7 OSC device.

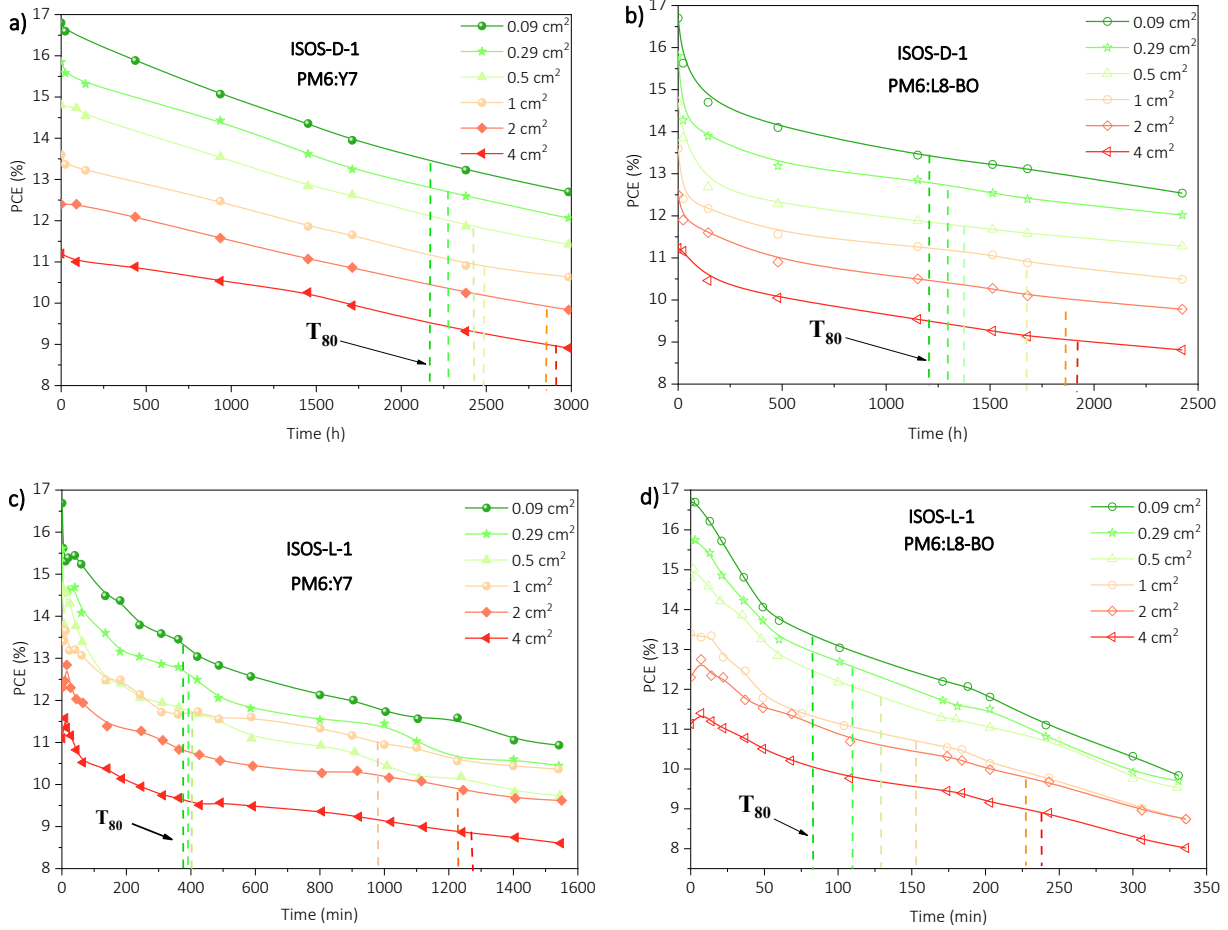

**Fig. S4** PCE over time of each device area with **PM6:Y7** and **PM6:L8-BO** active layer under dark and continuous illumination following the **ISOS-D-1** (a-b) and **ISOS-L-1** protocols (c-d).

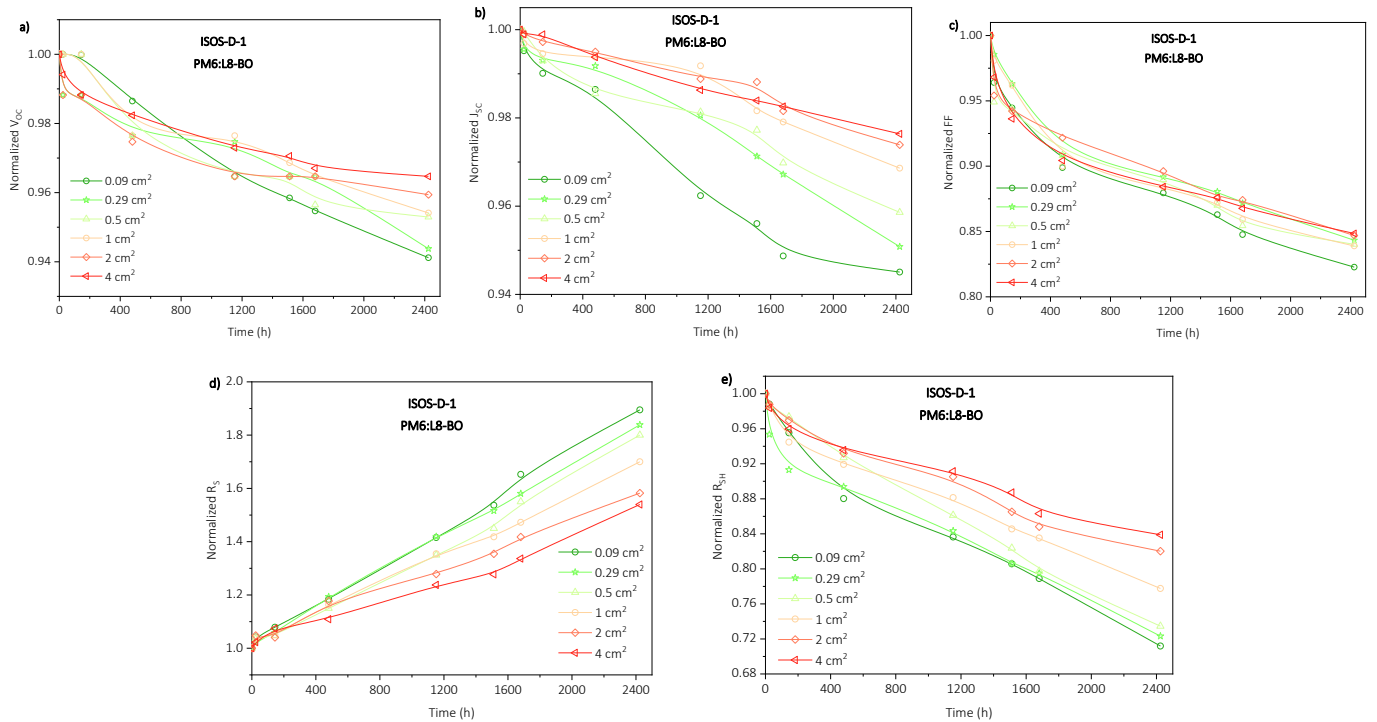

**S5.** Normalized device performance parameters over time of each area of **PM6:L8-BO** OSCs under dark and  $N_2$  following the **ISOS-D-1** protocols a)  $V_{oc}$  b)  $J_{sc}$  c) FF, d)  $R_s$ , and e)  $R_{sh}$ .

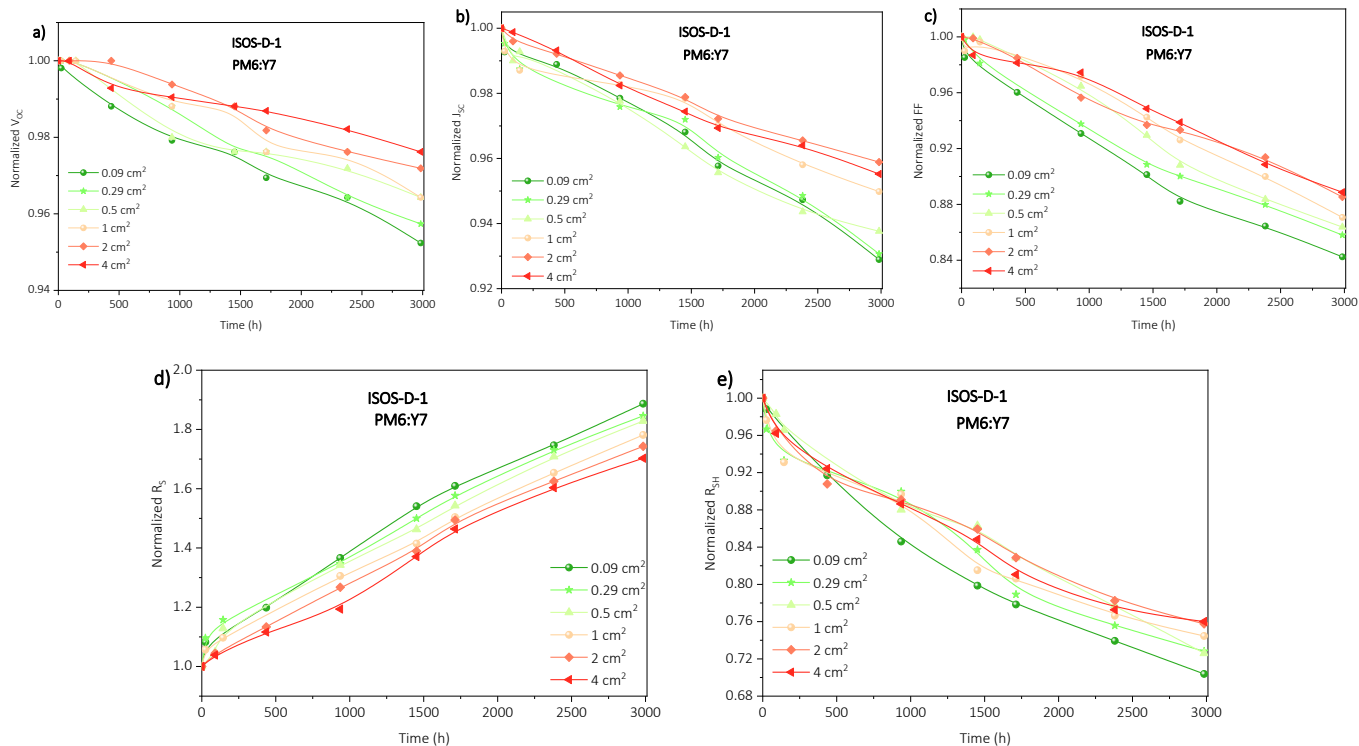

**S6.** Normalized device performance parameters over time of each area of **PM6:Y7** OSCs under dark and  $N_2$  following the **ISOS-D-1** protocols a)  $V_{oc}$  b)  $J_{sc}$  c) FF, d)  $R_s$ , and e)  $R_{SH}$ .

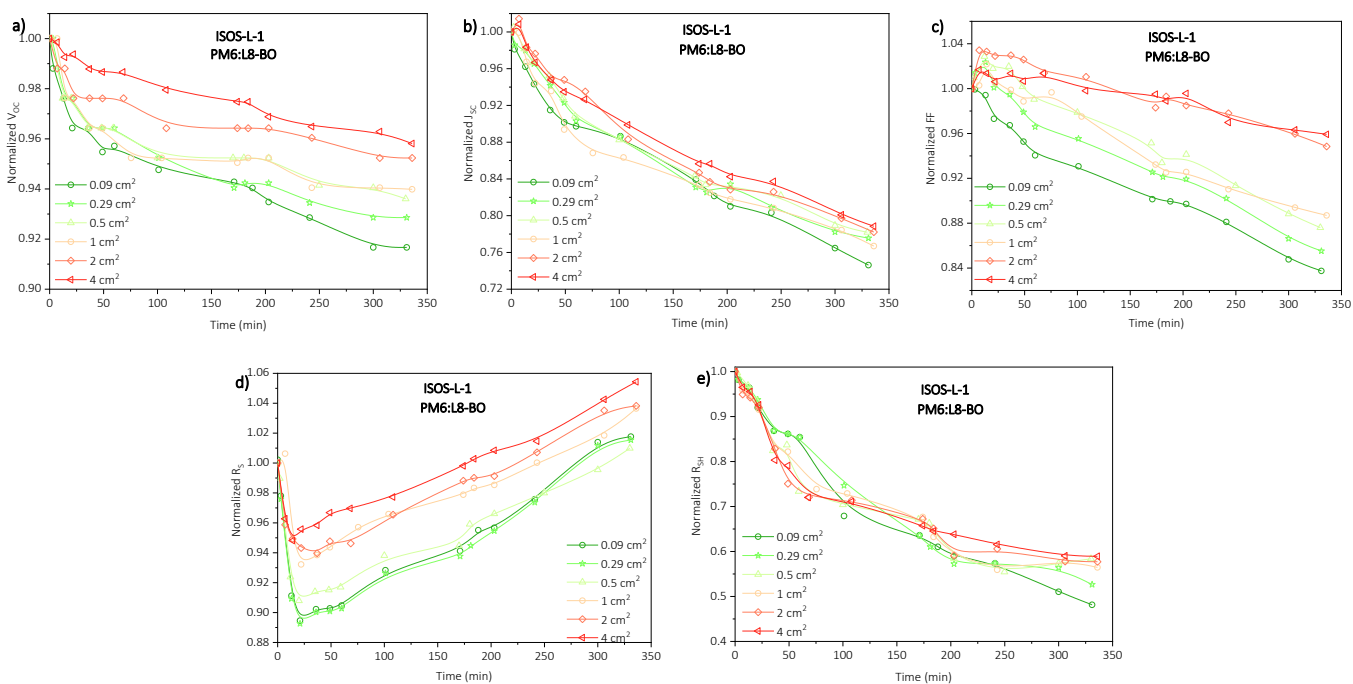

**S7** Normalized device performance parameters over time of each area of **PM6:L8-BO** OSCs under continuous illumination following the **ISOS-L-1** protocols a)  $V_{oc}$  b)  $J_{sc}$  c) FF, d)  $R_s$ , and e)  $R_{SH}$ .

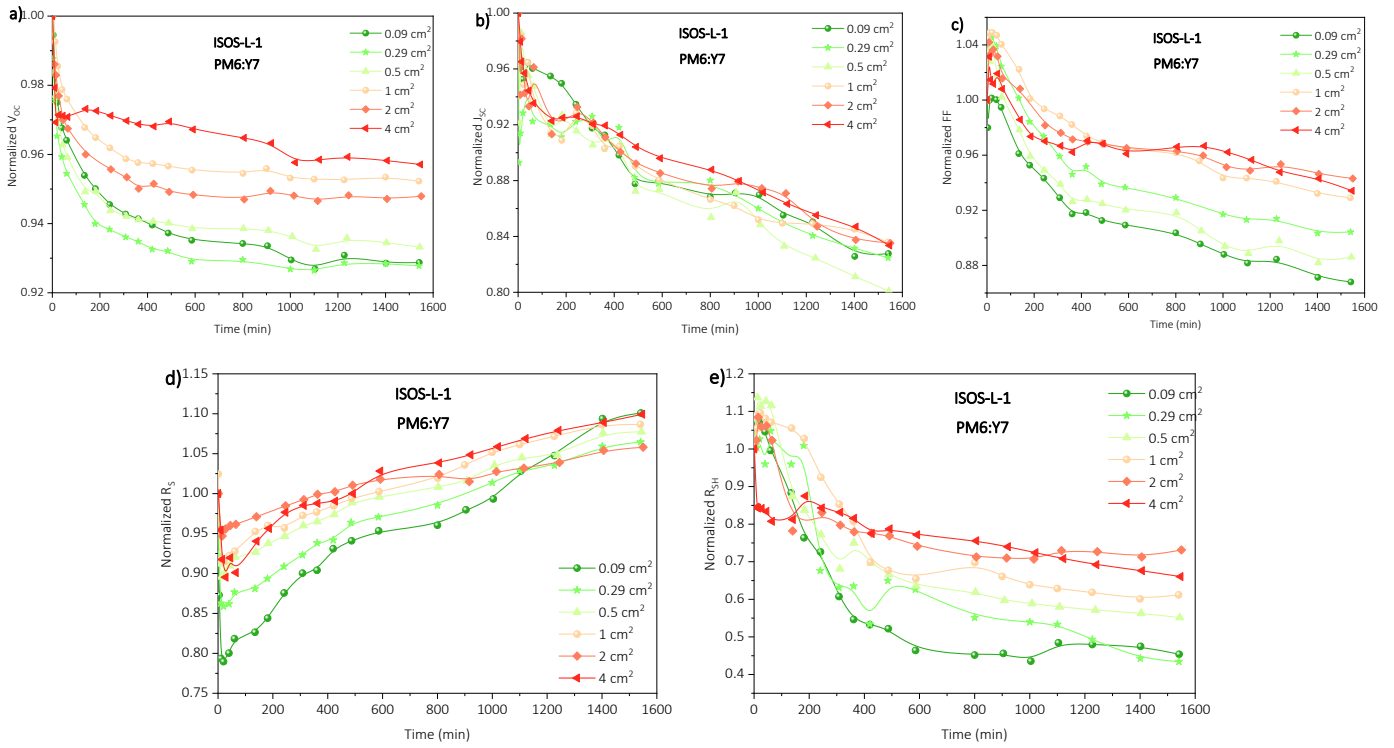

**S8** Normalized device performance parameters over time of each area of **PM6:Y7** OSCs under continuous illumination following the **ISOS-L-1** protocols **a)  $V_{oc}$**  **b)  $J_{sc}$**  **c) FF**, **d)  $R_s$** , and **e)  $R_{sh}$** .

Table S1: Performance parameters of OSCs with different active layer areas deposited by Spin Coating.

| Area<br>cm <sup>2</sup> | Active layer              | V <sub>oc</sub><br>(V) | J <sub>sc</sub><br>(mA cm <sup>-2</sup> ) | FF<br>(%) | PCE (%) | Ref.             |   |
|-------------------------|---------------------------|------------------------|-------------------------------------------|-----------|---------|------------------|---|
| 0.0315                  | PM6:L8-BO                 | 0.869                  | 26.35                                     | 79.60     | 18.23   | 2                |   |
| 0.04                    | PM6:L8-BO                 | 0.881                  | 26.50                                     | 77.90     | 18.20   | 3                |   |
| 0.04                    | PM6:L8-BO                 | 0.867                  | 25.24                                     | 78.20     | 17.90   | 4                |   |
| 0.041                   | PM6:L8-BO                 | 0.900                  | 26.60                                     | 79.40     | 19.00   | 5                |   |
| 0.06                    | PBDB-TF:BTP-4Cl-8 SC      | 0.872                  | 25.20                                     | 74.30     | 16.10   | 6                |   |
|                         | PBDB-TF:BTP-4Cl-12 SC     | 0.858                  | 25.60                                     | 77.60     | 16.60   |                  |   |
|                         | PBDB-TF:BTP-4Cl-16 SC     | 0.862                  | 24.20                                     | 74.00     | 15.20   |                  |   |
| 0.08                    | PM6:L8-BO                 | 0.888                  | 25.70                                     | 79.90     | 18.20   | 7                |   |
| 0.08                    | PM6:L8-BO                 | 0.870                  | 25.72                                     | 81.50     | 18.32   | 8                |   |
| 0.09                    | PBDB-TF:BTP-4Cl           | 0.866                  | 25.20                                     | 73.70     | 16.10   | 9                |   |
| 0.09                    | PM6:Y7                    | 0.836                  | 31.30                                     | 66.60     | 17.50   | 10               |   |
| 0.09                    | PM6:Y7                    | 0.850                  | 29.10                                     | 67.00     | 16.52   | 11               |   |
| 0.09                    | PM6:Y7                    | 0.846                  | 28.45                                     | 70.18     | 16.65   | <b>This Work</b> |   |
|                         | PM6:L8-BO                 | 0.841                  | 27.93                                     | 71.80     | 16.84   |                  |   |
| 0.29                    | PM6:Y7                    | 0.845                  | 27.56                                     | 69.54     | 15.85   |                  |   |
|                         | PM6:L8-BO                 | 0.843                  | 26.50                                     | 70.54     | 15.80   |                  |   |
| 0.50                    | PM6:Y7                    | 0.844                  | 27.45                                     | 68.12     | 14.82   |                  |   |
|                         | PM6:L8-BO                 | 0.843                  | 25.20                                     | 68.45     | 14.80   |                  |   |
| 0.81                    | PBDB-TF:BTP-4Cl-8 SC      | 0.863                  | 24.90                                     | 71.10     | 14.80   |                  | 6 |
|                         | PBDB-TF:BTP-4Cl-12 SC     | 0.849                  | 25.50                                     | 73.80     | 15.50   |                  |   |
|                         | PBDB-TF:BTP-4Cl-16 SC     | 0.854                  | 24.00                                     | 71.80     | 14.20   |                  |   |
| 1                       | PBDB-T-2F:N3:P(NDI2OD-T2) | 0.854                  | 24.74                                     | 66.80     | 14.12   | 12               |   |
| 1                       | PM6:Y6                    | 0.820                  | 22.70                                     | 63.00     | 11.60   | 13               |   |
| 1                       | PBDB-TF:BTP-4Cl           | 0.857                  | 24.90                                     | 69.00     | 14.80   | 9                |   |
| 1                       | PM6:PYT-1S1Se             | 0.906                  | 24.30                                     | 65.90     | 14.50   | 14               |   |
| 1                       | PM6:BTP-eC9               | 0.830                  | 24.90                                     | 73.00     | 15.10   | 15               |   |
| 1                       | PBDB-TF:BTP-eC11          | 0.843                  | 25.30                                     | 72.20     | 15.40   | 16               |   |
| 1                       | PBDB-TF:IT-4F             | 0.840                  | 19.87                                     | 67.00     | 11.18   | 17               |   |
| 1                       | PBDB-TF-T1:BTP-4F-12      | 0.842                  | 24.40                                     | 72.00     | 14.80   | 18               |   |
| 1                       | T1:IT-4F                  | 0.877                  | 20.90                                     | 75.00     | 13.70   | 19               |   |
| 1                       | PBDB-TF:IT-4F             | 0.860                  | 21.10                                     | 72.00     | 13.20   | 20               |   |
| 1                       | PBDB-T-SF:IT-4F           | 0.860                  | 18.93                                     | 68.20     | 11.10   | 21               |   |
| 1                       | B1:BTP-eC9                | 0.831                  | 24.22                                     | 64.00     | 12.88   | 22               |   |
| 1                       | PM6:PYF-T-o               | 0.900                  | 22.70                                     | 70.70     | 14.50   | 23               |   |
| 1                       | PM6:PYT1                  | 0.934                  | 21.33                                     | 57.40     | 11.43   | 24               |   |
| 1                       | PM6:ICBA:IT-4F            | 0.871                  | 20.64                                     | 73.30     | 13.17   | 25               |   |
| 1                       | PM6:Y6 (BHJ)              | 0.835                  | 25.52                                     | 65.74     | 14.01   | 26               |   |
| 1                       | PM6:IDIC                  | 0.950                  | 16.90                                     | 71.00     | 11.40   | 27               |   |
| 1                       | PCT-EHp:Y6                | 0.790                  | 26.68                                     | 63.70     | 13.42   | 28               |   |
| 1                       | J71:ITC6-IC               | 0.973                  | 16.16                                     | 65.79     | 10.35   | 29               |   |
| 1                       | PTQ10:IDIC                | 0.965                  | 15.89                                     | 67.90     | 10.42   |                  |   |
| 1                       | PFA1:PTzBI-oF             | 0.890                  | 23.99                                     | 65.79     | 14.03   | 30               |   |
| 1                       | PM6:L8-BO                 | 0.844                  | 24.84                                     | 65.42     | 13.32   | <b>This Work</b> |   |
|                         | PM6:Y7                    | 0.843                  | 27.31                                     | 62.70     | 13.74   |                  |   |
| 2.4                     | PM6:BTP-eC9               | 0.770                  | 22.80                                     | 63.00     | 11.40   | 31               |   |

|   |           |       |       |       |       |                  |
|---|-----------|-------|-------|-------|-------|------------------|
| 2 | PM6:L8-BO | 0.845 | 24.50 | 59.56 | 12.42 | <b>This Work</b> |
|   | PM6:Y7    | 0.842 | 26.68 | 57.01 | 12.51 |                  |
| 4 | PM6:Y6    | 0.800 | 20.92 | 61.00 | 10.21 | <sup>13</sup>    |
| 4 | PM6:L8-BO | 0.848 | 24.20 | 53.77 | 11.17 | <b>This Work</b> |
|   | PM6:Y7    | 0.842 | 25.93 | 50.40 | 10.69 |                  |

## References

- [1] M. A. Green, *Solar Cells. Operating principles, Technology and System Applications*, Prentice-Hall, 1982.
- [2] J. Song, L. Zhu, C. Li, J. Xu, H. Wu, X. Zhang, and Y. Sun, *Matter*, 2021, **4**, 2542-2552.
- [3] W. Wu, B. Zou, R. Ma, J. Yao, C. Li, Z. Luo, B. Xie, M. Qammar, T. A. Dela Peña, M. Li, J. Wu, C. Yang, Q. Fan, W. Ma, G. Li, H. Yan, *Small*, 2024, **20**, 2402793.
- [4] Z. Zhang, Q. Chen, C. Zhang, W. L. Tan, G. Zhang, Z. Bu, C. Xiao, X. Shen, Z. Tang, C. R. McNeill, W. Li, *Adv. Funct. Mater.*, 2024, **34**, 2401823.
- [5] B. Cheng, X. Xia, Z. Fu, D. Jiang, C. Han, Y. Huo, F. Hua, H. Wang, S. Cheng, F. Sun, K. Zhang, X. Guo, H. Yin, X. Du, X. Hao, Y. Li, and M. Zhang, *Sci. China Chem.*, 2026, 1-10.
- [6] Y. Cui, H. Yao, L. Hong, T. Zhang, Y. Tang, B. Lin, K. Xian, B. Gao, C. An, P. Bi, W. Ma, J. Hou, *Natl. Sci. Rev.*, 2020, **7**, 1239–1246.
- [7] L. Zhu, M. Zhang, J. Xu, C. Li, J. Yan, G. Zhou, W. Zhong, Tianyu Hao, J. Song, X. Xue, Z. Zhou, R. Zeng, H. Zhu, C.-C. Chen, R. C. I. MacKenzie, Y. Zou, J. Nelson, Y. Zhang, Y. Sun, F. Liu, *Nat Mater.*, 2022, **21**, 656-663.
- [8] C. Li, J. Zhou, J. Song, J. Xu, H. Zhang, X. Zhang, J. Guo, L. Zhu, D. Wei, G. Han, J. Min, Y. Zhang, Z. Xie, Y. Yi, H. Yan, F. Gao, F. Liu and Y. Sun, *Nat. Energy*, 2021, **6**, 605–613.
- [9] Y. Cui, H. Yao, J. Zhang, T. Zhang, Y. Wang, L. Hong, K. Xian, B. Xu, S. Zhang, J. Peng, Z. Wei, F. Gao and J. Hou, *Nat. Commun.*, 2019, **10**, 2515.
- [10] M. Ramírez-Como, E. Moustafa, M. Samir, A. A. A. Torimtubun, J. G. Sánchez, J. Pallarès and L. F. Marsal, *Sustain. Energy Fuels*, 2023, **7**, 3883-3892.
- [11] M. Samir, E. Moustafa, O. Almora, M. Ramírez-Como, M. P. Montero-Rama, J. G. Sánchez, E. Palomares, J. Pallarès, and L. F. Marsal, *ACS Appl. Mater. Interfaces*, 2024, **16**, 16317-16327.
- [12] S. Yoon, Sungmin Park, S. H. Park, S. Nah, S. Lee, J. W. Lee, H. Ahn, H. Yu, E. Y. Shin, B. J. Kim, B. K. Min, J. H. Noh, H. J. Son, *Joule*, 2022, **6**, 2406-2422.
- [13] W. Pan, Y. Han, Z. Wang, C. Gong, J. Guo, J. Lin, Q. Luo, S. Yang, and C. Q. Ma, *J. Mater. Chem. A*, 2021, **9**, 16889-16897.
- [14] H. Fu, Q. Fan, W. Gao, J. Oh, Y. Li, F. Lin, F. Qi, C. Yang, T. J. Marks, and A. K. Y. Jen, *Sci. China Chem.*, 2022, **65**, 309-317.
- [15] Q. Kang, Z. Zheng, Y. Zu, Q. Liao, P. Bi, S. Zhang, Y. Yang, B., Xu, J. Hou, *Joule*, 2021, **5**, 646-658.
- [16] Y. Cui, H. Yao, J. Zhang, K. Xian, T. Zhang, L. Hong, Y. Wang, Y. Xu, K. Ma, C. An, C. He, Z. Wei, F. Gao, J. Hou, *Adv. Mater.* 2020, **32**, 1908205.
- [17] Y. Han, X. Chen, J. Wei, G. Ji, C. Wang, W. Zhao, J. Lai, W. Zha, Z. Li, L. Yan, H. Gu, Q. Luo, Q. Chen, L. Chen, J. Hou, W. Su, C. Q. Ma, *Adv. Sci.*, 2019, **6**, 1901490.

- [18] L. Hong, H. Yao, Z. Wu, Y. Cui, T. Zhang, Y. Xu, R. Yu, Q. Liao, B. Gao, K. Xian, H. Y. Woo, Z. Ge, J. Hou, *Adv. Mater.* 2019, **31**, 1903441.
- [19] Y. Cui, H. Yao, L. Hong, T. Zhang, Y. Xu, K. Xian, B. Gao, J. Qin, J. Zhang, Z. Wei, J. Hou, *Adv. Mater.* 2019, **31**, 1808356.
- [20] Q. Kang, L. Ye, B. Xu, C. An, S. J. Stuard, S. Zhang, H. Yao, H. Ade, J. Hou, *Joule*, 2019, **3**, 227-239.
- [21] W. Zhao, S. Li, H. Yao, S. Zhang, Y. Zhang, B. Yang,; J. Hou, *J. Am. Chem. Soc.*, 2017, **139**, 7148-7151.
- [22] R. Sun, Y. Wu, J. Guo, Y. Wang, F. Qin, B. Shen, D. Li, T. Wang, Y. Li, Y. Zhou, G. Lu, Y. Li, J. Min, *Energy Environ. Sci.*, 2021, **14**, 3174-3183
- [23] H. Yu, M. Pan, R. Sun, I. Agunawela, J. Zhang, Y. Li, Z. Qi, H. Han, X. Zou, W. Zhou, S. Cheng, J. Y. L. Lai, S. Luo, Z. Luo, D. Zhao, X. Lu, H. Ade, F. Huang, J. Min, H. Yan, *Angew. Chem. Int. Ed.*, 2021, **60**, 10137-10146.
- [24] Q. Wu, W. Wang, T. Wang, R. Sun, J. Guo, Y. Wu, X. Jiao, C. J. Brabec, Y. Li, J. Min, *Sci. China Chem.*, 2020, **63**, 1449-1460.
- [25] Z. Xing, X. Meng, R. Sun, T. Hu, Z. Huang, J. Min, X. Hu, Y. Chen, *Adv. Funct. Mater.*, 2020, **30**, 2000417.
- [26] R. Sun, Q. Wu, J. Guo, T. Wang, Y. Wu, B. Qiu, Z. Luo, W. Yang, Z. Hu, J. Guo, M. Shi, C. Yang, F. Huang, Y. Li, J. Min, *Joule*, 2020, **4**, 407-419.
- [27] Q. Fan, Y. Wang, M. Zhang, B. Wu, X. Guo, Y. Jiang, W. Li, B. Guo, C. Ye, W. Su, J. Fang, X. Ou, F. Liu, Z. Wei, T. C. Sum, T. P. Russell, Y. Li, *Adv. Mater.*, 2018, **30**, 1704546.
- [28] B. Fan, Z. Zeng, W. Zhong, L. Ying, D. Zhang, M. Li, F. Peng, N. Li, F. Huang, Y. Cao, *ACS Energy Lett.*, 2019, **4**, 2466-2472.
- [29] R. Sun, J. Guo, C. Sun, T. Wang, Z. Luo, Z. Zhang, X. Jiao, W. Tang, C. Yang, Y. Li, J. Min, *Energy Environ. Sci.*, 2019, **12**, 384-395.
- [30] F. Peng, K. An, W. Zhong, Z. Li, L. Ying, N. Li, Z. Huang, C. Zhu, B. Fan, F. Huang, Y. Cao, *ACS Energy Lett.* 2020, **5**, 3702-3707.
- [31] D. Corzo, D. Rosas-Villalva, Amruth C, G. Tostado-Blázquez, E. B. Alexandre, L. Huerta, J. Han, H. Xu, M. Babics, S. De-Wolf and D. Baran, *Nat Energy*, 2023, **8**, 62–73.
